# Supplementary material for: Rapid in situ growth of β-Ni(OH)2 nanosheet arrays on nickel foam as an integrated electrode for supercapacitors exhibiting high energy density
Source: Royal Society of Chemistry journal article supplement (doi:10.1039/d0dt00687d), 2020-01-01
Supplement: d0dt00687d5.pdf [file d0dt00687d5.pdf]

# Supporting Information

## Rapid In-situ Growth of $\beta$ -Ni(OH)<sub>2</sub> Nanosheet Arrays on Nickel Foams as Integrated Electrodes for Supercapacitors Exhibiting Ultrahigh Energy Density

Jingbo Li<sup>1,‡</sup>, Yu Liu<sup>2,1,‡</sup>, Wei Cao<sup>1,‡</sup>, Nan Chen<sup>1,\*</sup>

1. School of Materials Science and Engineering, Nanchang University, Nanchang 330031, China

2. School of Science, Nanchang Institute of Technology, Nanchang 330099, China

\* Corresponding author. E-mail: nanchen@ncu.edu.cn (N. Chen).

In order to calculate the mass of Ni(OH)<sub>2</sub>, the samples (2 cm<sup>2</sup>) were kept in a tube furnace at 650 °C for 6 h with a heating rate of 10 °C min<sup>-1</sup> and provided on-going H<sub>2</sub>, then the reactions following equation S1 and S2:

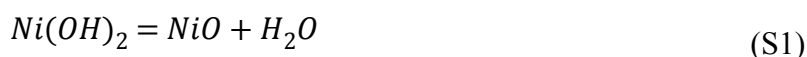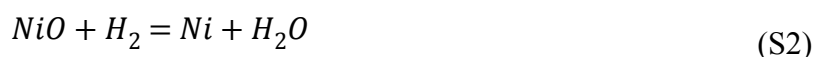

According to the change of weight, the active mass of Ni(OH)<sub>2</sub> could be calculated as 12.46 mg, then the loading density was 6.23 mg cm<sup>-2</sup>.

To calculate the mass ratio of electrode materials, it is adjusted according to following equation S3:

$$\frac{m^+}{m^-} = \frac{C_s^- \times \Delta V^-}{C_s^+ \times \Delta V^+} \quad (\text{S3})$$

C<sub>s</sub> (F g<sup>-1</sup>) is the specific capacitance of electrode material, ΔV is the potential window and m (g) is the mass of electrode materials. The calculate result is 2, which means the loading density of active carbon is 12.46 mg cm<sup>-2</sup>.

Energy density ( $E$ ) and power density ( $P$ ), are two main parameters to survey the performance of cell.  $E$  (Wh Kg<sup>-1</sup>) and  $P$  (W Kg<sup>-1</sup>) can be described using the following equations S4 and S5:

$$E = \frac{I}{m} \int_{t_1}^{t_2} V dt \quad (\text{S4})$$

$$P = \frac{E}{\Delta t} \quad (\text{S5})$$

Where  $m$  are the mass of the electrode materials consist of negative and positive electrodes,  $V$  is the device potential window,  $\Delta t$  is the discharging time and  $I$  is the discharge/charge current.

## List of Videos

**Video. S1**  $\beta$ -Ni(OH)<sub>2</sub> nanosheets in-situ grown on nickel foam collector while supplied 0.4 V voltage in 1 M KOH electrolyte.

File: Video. S1.mp4

## List of Figure Captions

**Fig. S1** Energy dispersive spectrum (EDS) of NF after 2 M H<sub>2</sub>SO<sub>4</sub> pre-treatment.

**Fig. S2** A photograph of the ASC device assembled with membrane,  $\beta$ -Ni(OH)<sub>2</sub>@NF cathode and activated carbon (AC)@NF anode.

**Fig. S3** CV curves of the ASC in different potential ranges at a scan rate of 50 mV s<sup>-1</sup> (a), and GCD curves of the ASC in different potential ranges at a current density of 4 mA cm<sup>-2</sup> (b).

**Fig. S4** CV curves of the AC at different scan rates from 2 mV s<sup>-1</sup> to 100 mV s<sup>-1</sup> (a), and GCD curves of the AC at different current density from 0.5 A g<sup>-1</sup>- 2.5 A g<sup>-1</sup> (b). Specific capacity as a function current density for the AC electrodes (c). Nyquist plots of AC

electrode (d) (insets are the magnified view of the Nyquist curves and equivalent circuit).

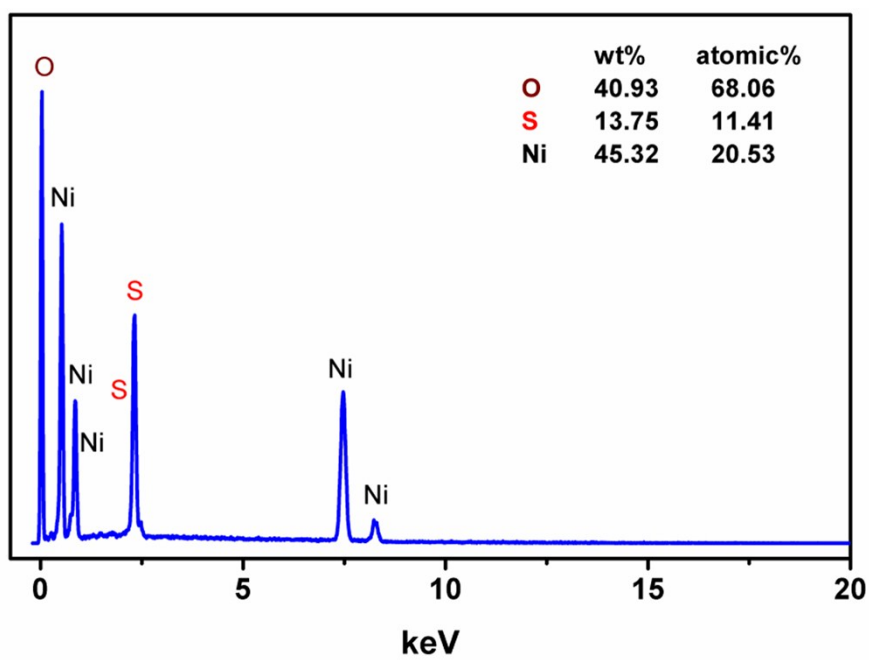

**Fig. S1** Energy dispersive spectrum (EDS) of NF after 2 M H<sub>2</sub>SO<sub>4</sub> pre-treatment.

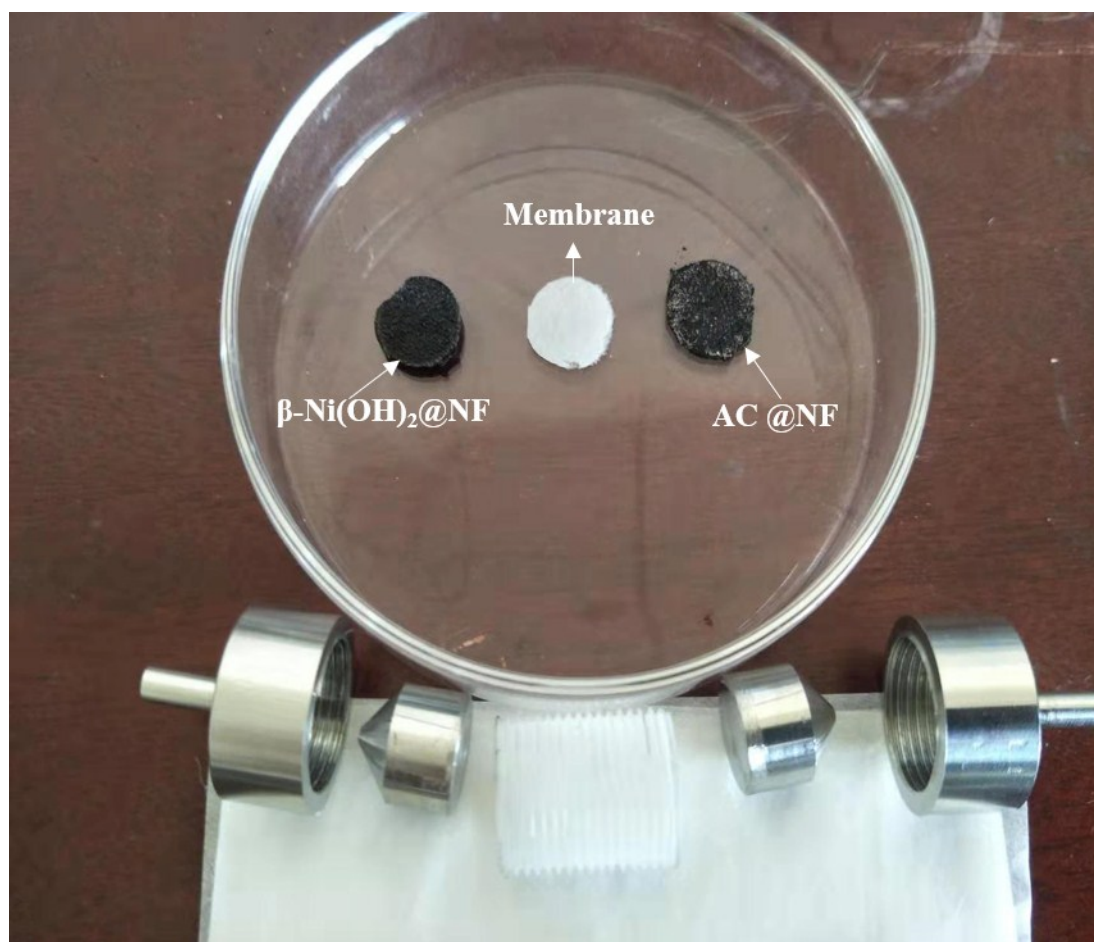

**Fig. S2** A photograph of the ASC device assembled with membrane,  $\beta\text{-Ni(OH)}_2\text{@NF}$  cathode and activated carbon (AC) $\text{@NF}$  anode.

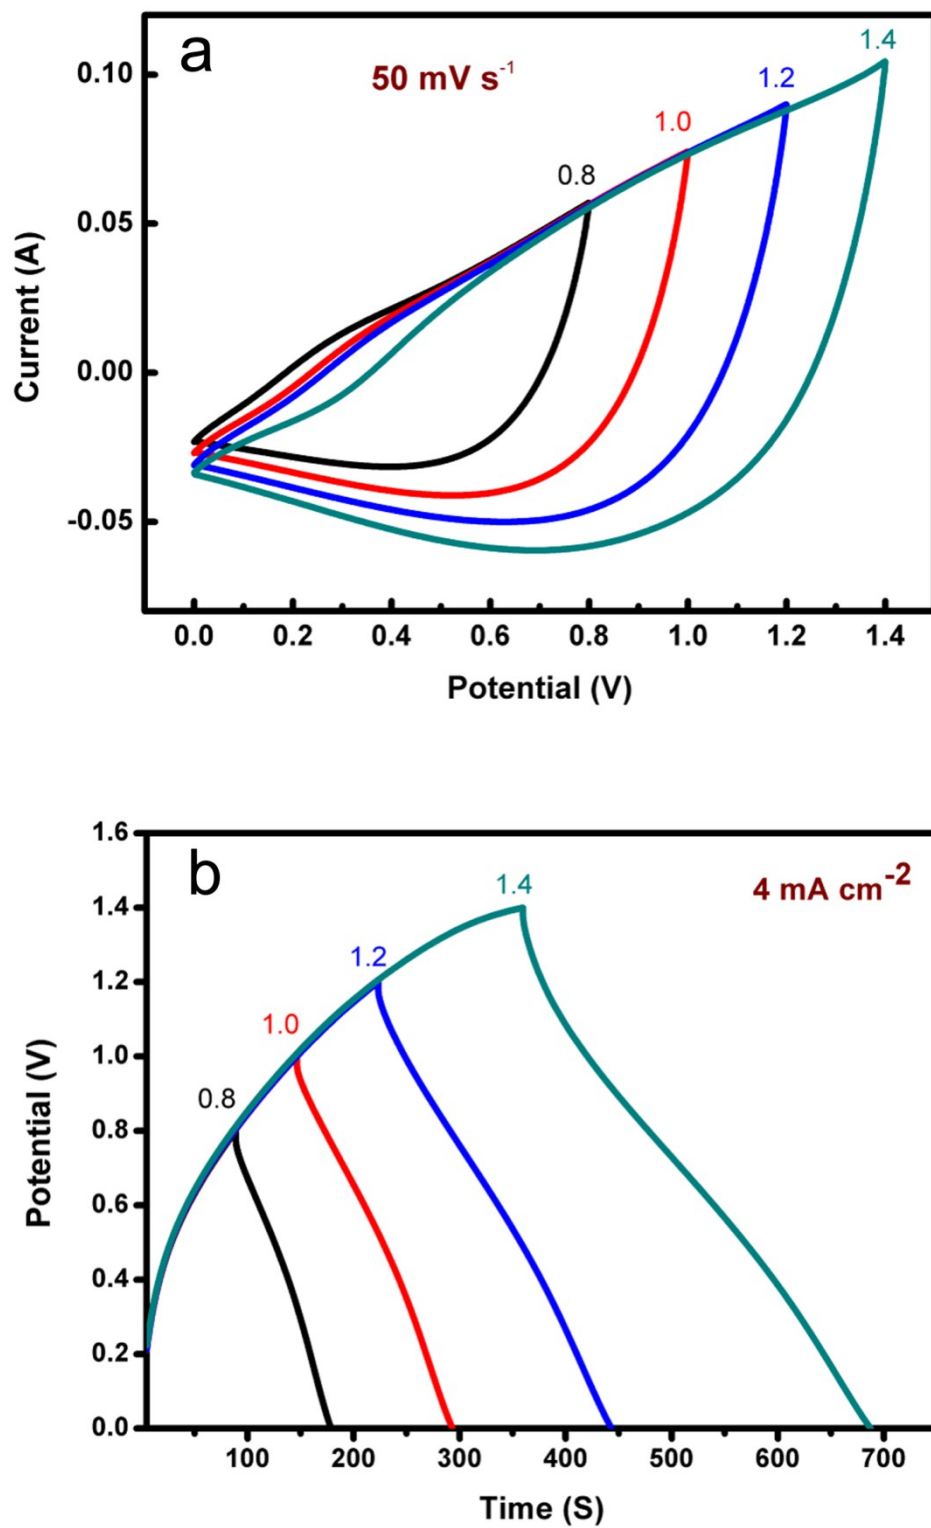

**Fig. S3** CV curves of the ASC in different potential ranges at a scan rate of  $50 \text{ mV s}^{-1}$  (a), and GCD curves of the ASC in different potential ranges at a current density of  $4 \text{ mA cm}^{-2}$  (b).

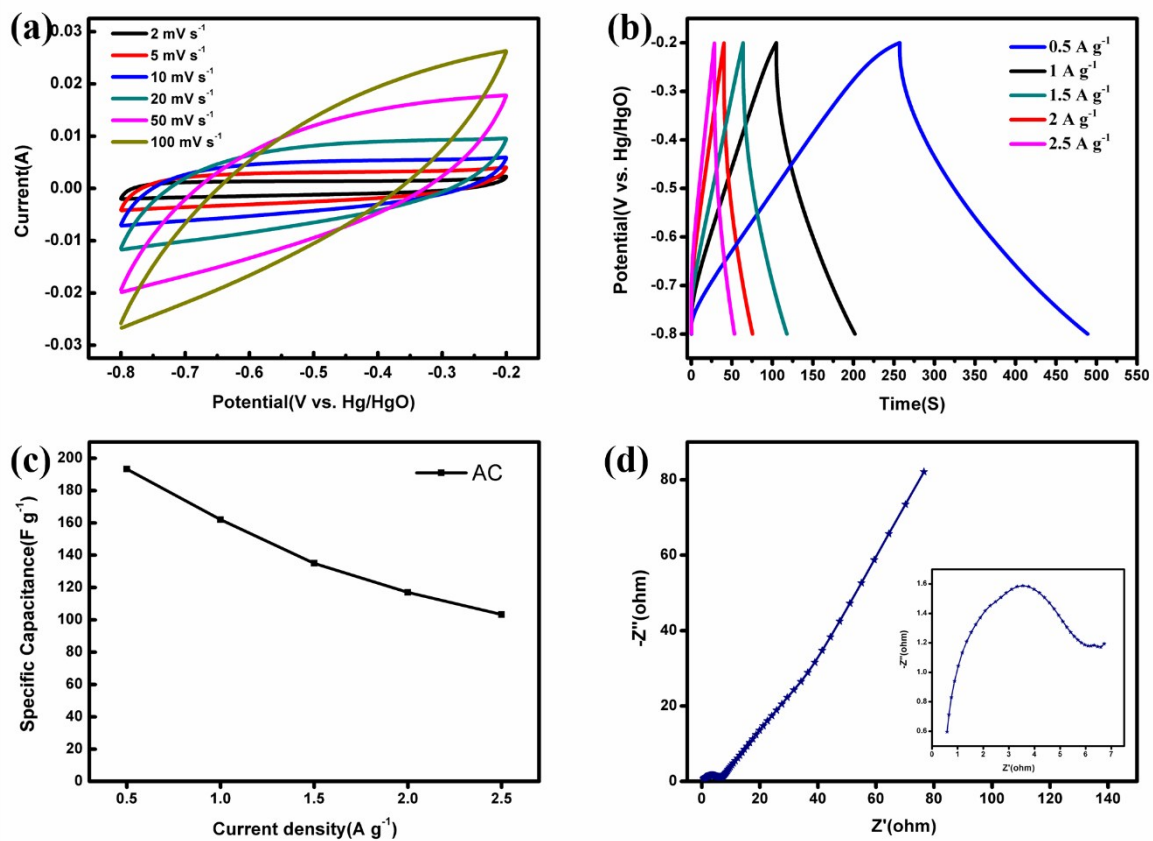

**Fig. S4** CV curves of the AC at different scan rates from 2  $\text{mV s}^{-1}$  to 100  $\text{mV s}^{-1}$  (a), and GCD curves of the AC at different current density from 0.5  $\text{A g}^{-1}$ - 2.5  $\text{A g}^{-1}$  (b). Specific capacitance as a function current density for the AC electrodes (c). Nyquist plots of AC electrode (insets are the magnified view of the Nyquist curves and equivalent circuit).
