# Supplementary figures and images for: Rapid in situ growth of β-Ni(OH)2 nanosheet arrays on nickel foam as an integrated electrode for supercapacitors exhibiting high energy density
Source: Royal Society of Chemistry journal article supplement (doi:10.1039/d0dt00687d), 2020-01-01

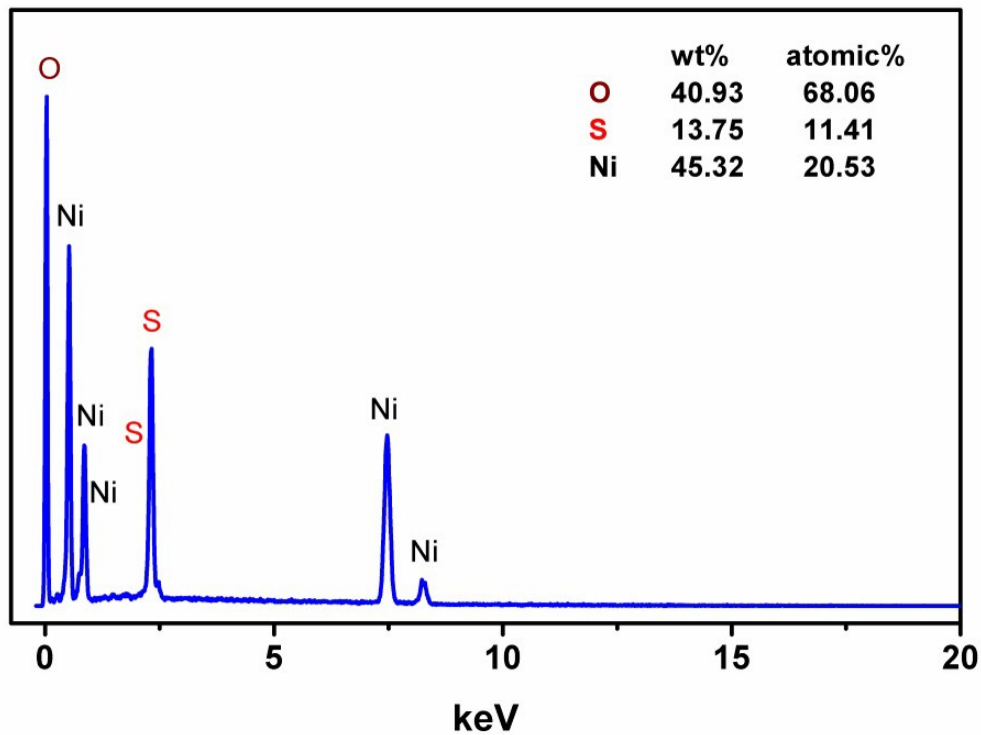

Supplement: d0dt00687d1.pdf [file d0dt00687d1.pdf]

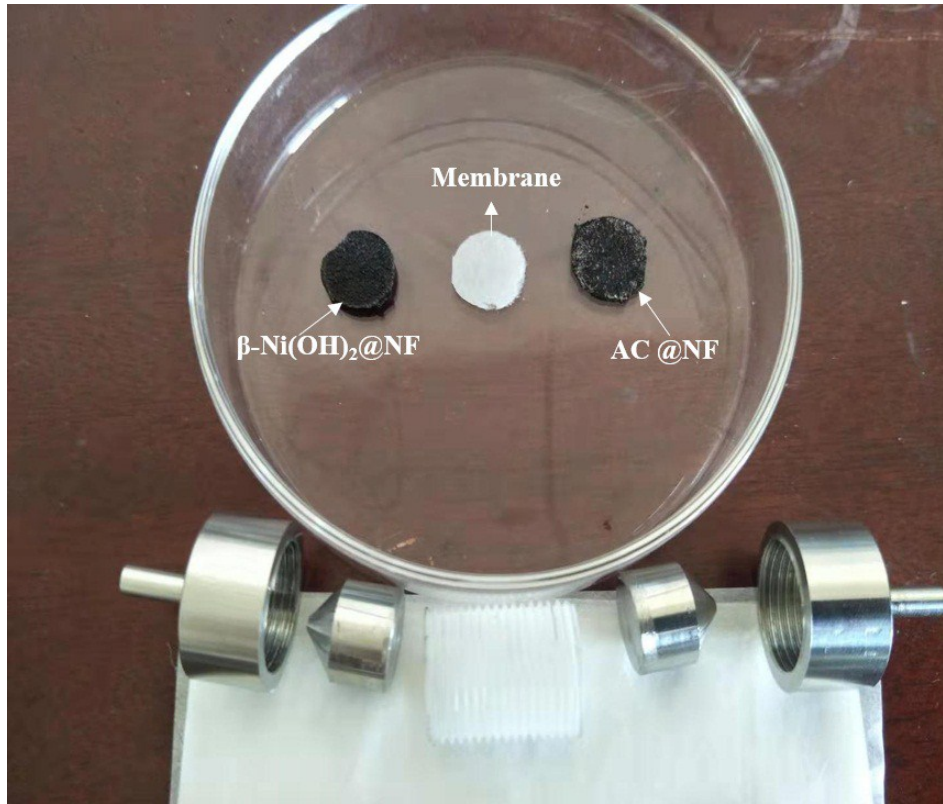

Supplement: d0dt00687d2.pdf [file d0dt00687d2.pdf]

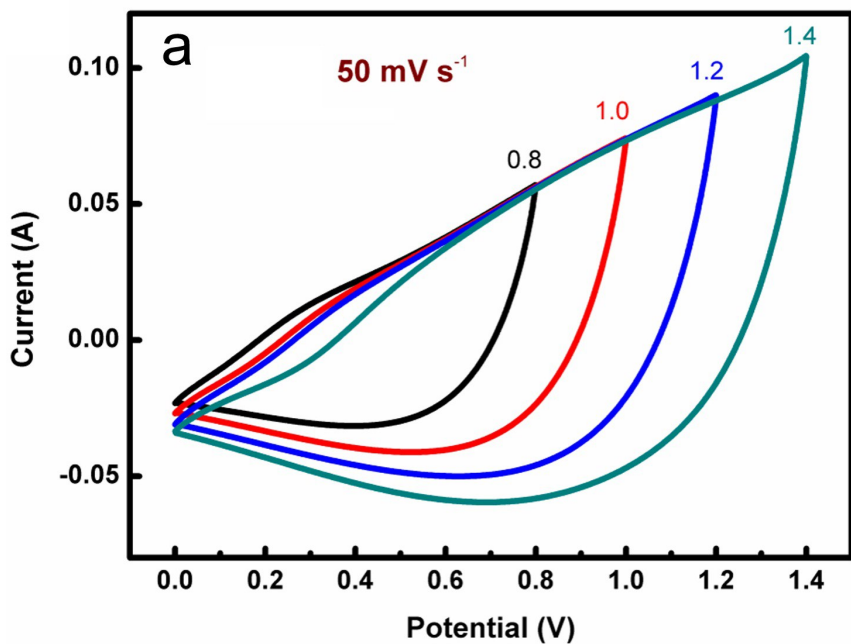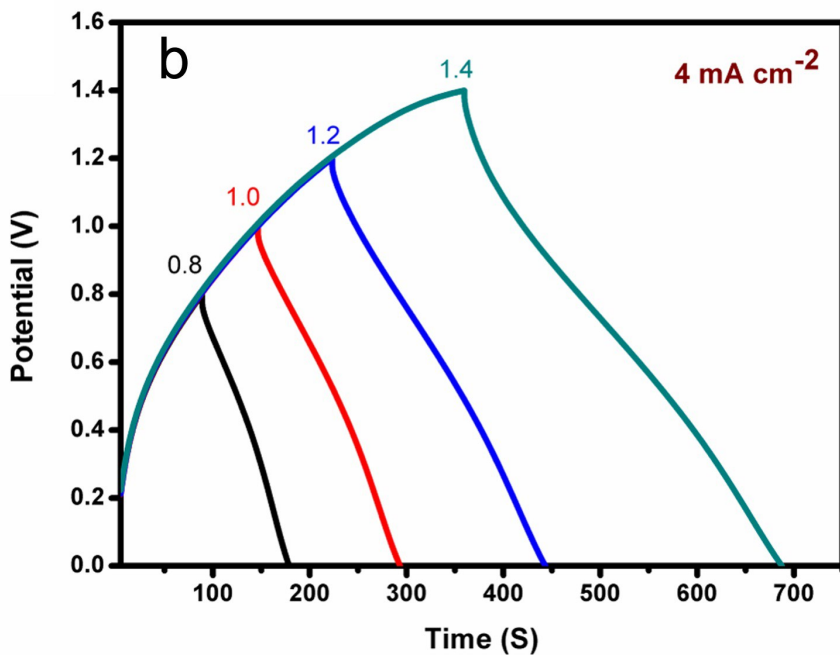

Supplement: d0dt00687d3.pdf [file d0dt00687d3.pdf]

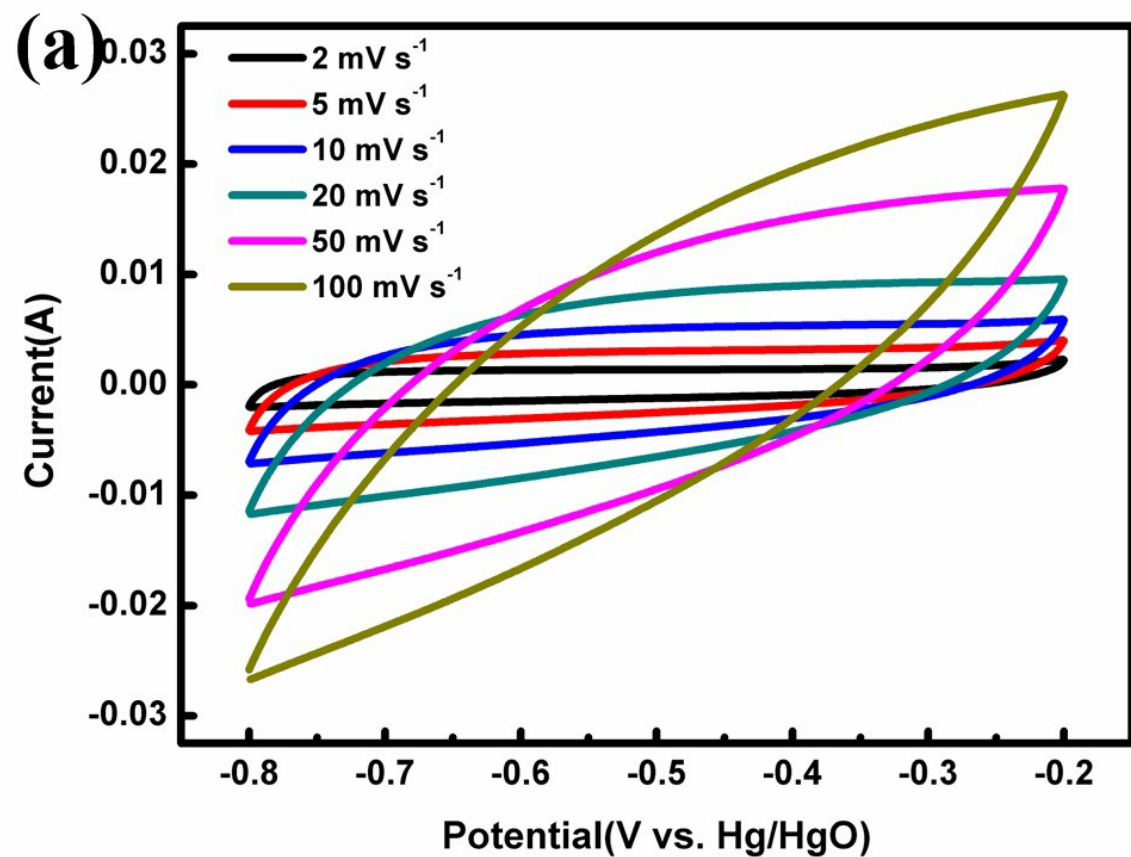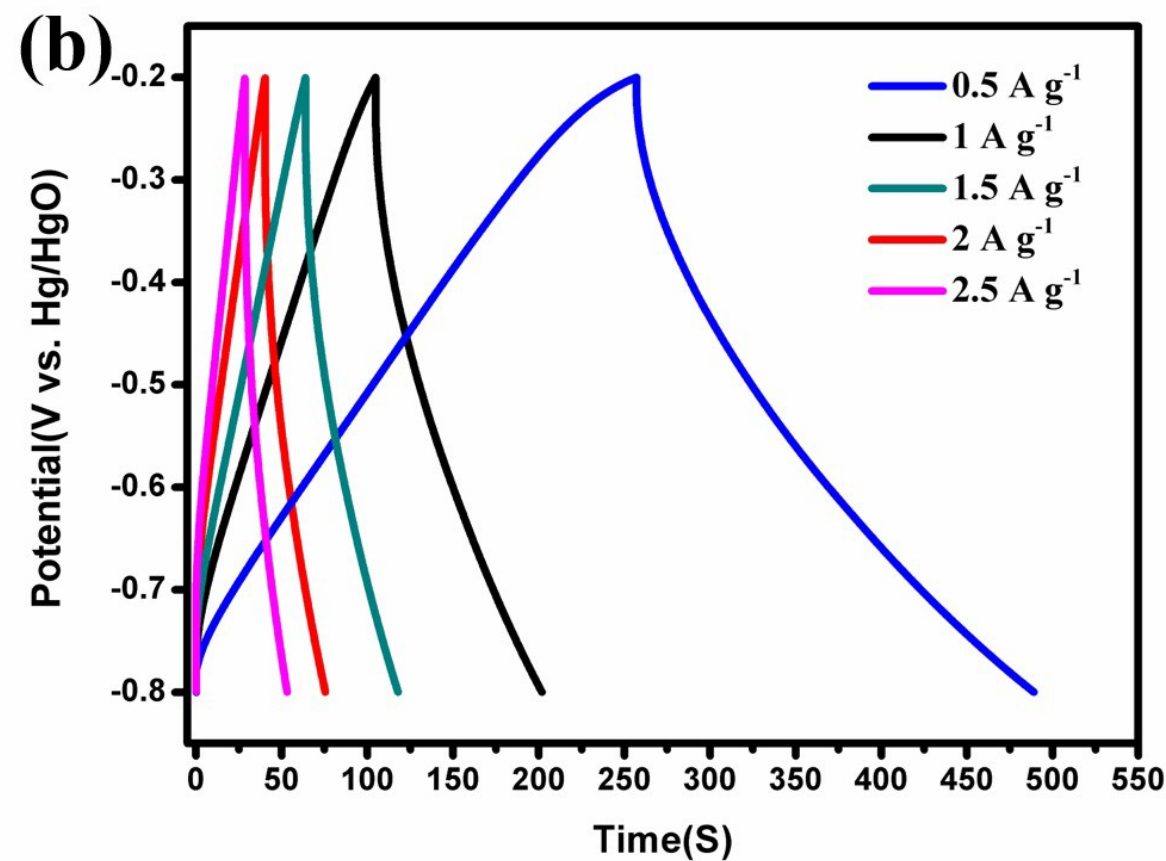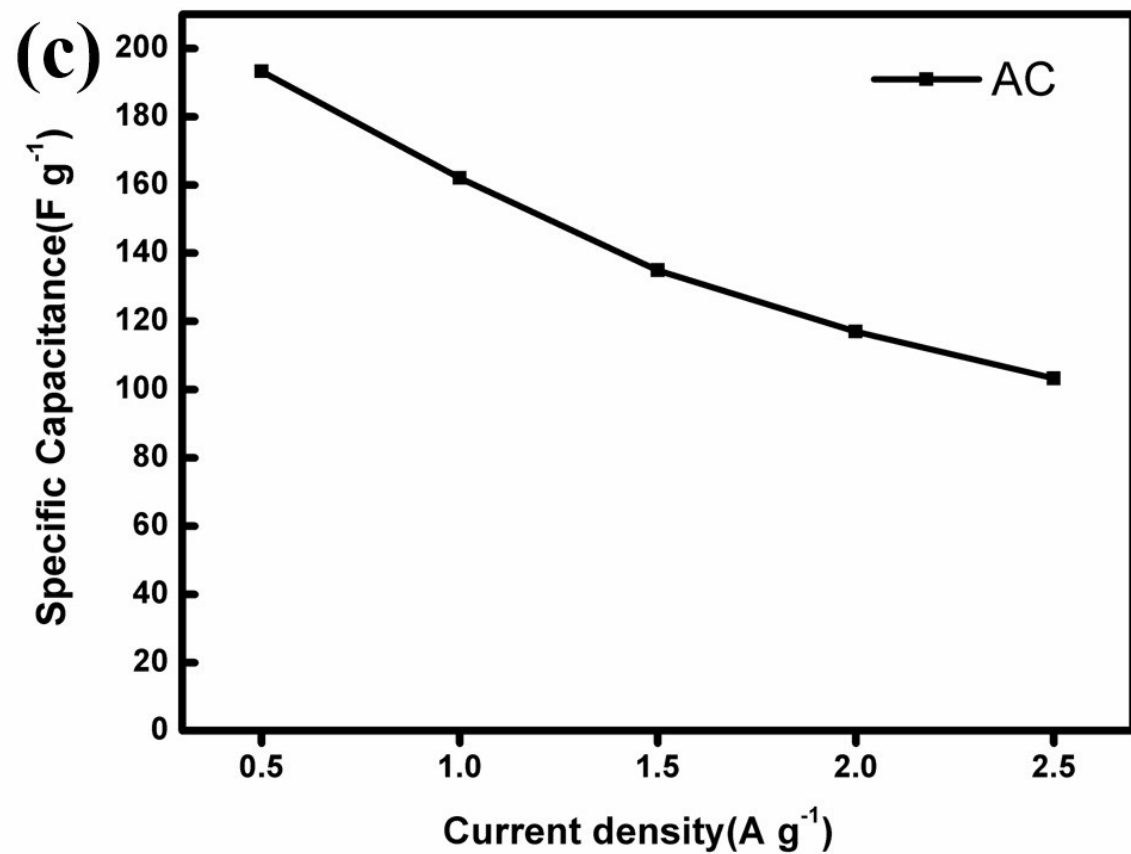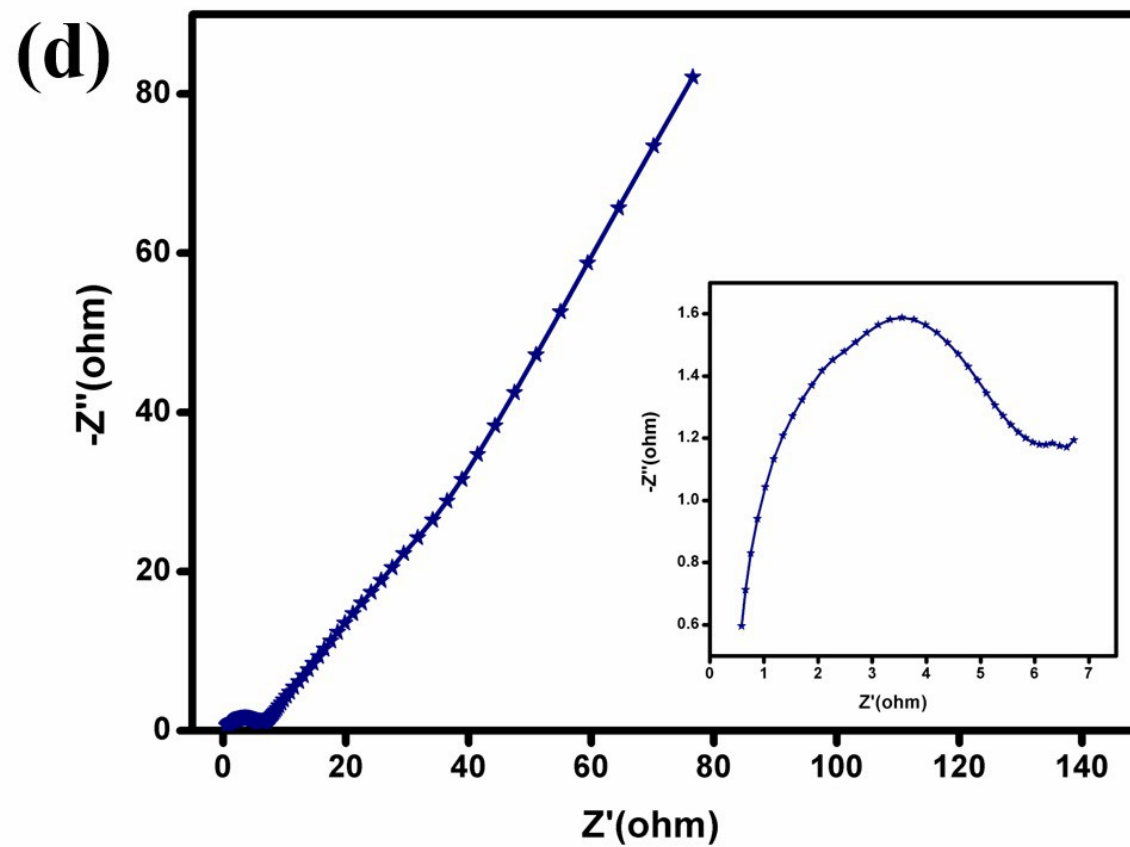

Supplement: d0dt00687d4.pdf [file d0dt00687d4.pdf]
